# Supplementary material
Source: PubMed Central journal article supplement (PMC7275701)
Supplement: pnas.1919683117.sapp.pdf [file pnas.1919683117.sapp.pdf]

## Supporting Information

Table S1. Strains and plasmids used in this manuscript; related to Bacterial Strains and Growth Conditions in Methods section

| Designation | Strain                                                  | Background (resistance) | Purpose                                                    | Reference            |
|-------------|---------------------------------------------------------|-------------------------|------------------------------------------------------------|----------------------|
| ZMG01       | WT EHEC                                                 | 86-24 (StrR)            | O157:H7 parent strain                                      | Griffin et al., 1988 |
| ZMG02       | $\Delta argR$ EHEC                                      | 86-24 (StrR)            | <i>argR</i> deletion in 86-24                              | This study           |
| ZMG03       | $\Delta artP$ EHEC                                      | 86-24 (StrR)            | <i>artP</i> deletion in 86-24                              | This study           |
| ZMG04       | $\Delta argH$ EHEC                                      | 86-24 (StrR)            | <i>argH</i> deletion in 86-24                              | This study           |
| ZMG05       | WT EHEC pACYC184 empty vector                           | 86-24 (StrR CmR TetR)   | WT EHEC complementation control                            | This study           |
| ZMG06       | $\Delta argR$ EHEC pACYC184 empty vector                | 86-24 (StrR CmR TetR)   | $\Delta argR$ EHEC complementation control                 | This study           |
| ZMG07       | $\Delta artP$ EHEC pACYC184 empty vector                | 86-24 (StrR CmR TetR)   | $\Delta artP$ EHEC complementation control                 | This study           |
| ZMG08       | $\Delta argR$ EHEC pACYC184 <i>argR</i>                 | 86-24 (StrR TetR)       | $\Delta argR$ EHEC with <i>argR</i> complementation vector | This study           |
| ZMG09       | $\Delta artP$ EHEC pACYC184 <i>artP</i>                 | 86-24 (StrR TetR)       | $\Delta artP$ EHEC with <i>artP</i> complementation vector | This study           |
| ZMG10       | WT <i>C. rodentium</i>                                  | DBS770 (CmR)            | parent strain                                              | Mallick et al., 2012 |
| ZMG11       | $\Delta argR$ <i>C. rodentium</i>                       | DBS770 (CmR)            | <i>argR</i> deletion in DBS770                             | This study           |
| ZMG12       | $\Delta artP$ <i>C. rodentium</i>                       | DBS770 (CmR)            | <i>artP</i> deletion in DBS770                             | This study           |
| ZMG13       | WT <i>C. rodentium</i> pACYC184 empty vector            | DBS770 (CmR TetR)       | WT DBS770 complementation control                          | This study           |
| ZMG14       | $\Delta argR$ <i>C. rodentium</i> pACYC184 empty vector | DBS770 (CmR TetR)       | $\Delta argR$ DBS770 complementation control               | This study           |

|                    |                                                         |                                |                                                              |                  |
|--------------------|---------------------------------------------------------|--------------------------------|--------------------------------------------------------------|------------------|
| ZMG15              | $\Delta artP$ <i>C. rodentium</i> pACYC184 empty vector | DBS770 (CmR TetR)              | $\Delta artP$ DBS770 complementation control                 | This study       |
| ZMG16              | $\Delta argR$ <i>C. rodentium</i> pACYC184 <i>argR</i>  | DBS770 (CmR TetR)              | $\Delta argR$ DBS770 with <i>argR</i> complementation vector | This study       |
| ZMG17              | $\Delta artP$ <i>C. rodentium</i> pACYC184 <i>artP</i>  | DBS770 (CmR TetR)              | $\Delta artP$ DBS770 with <i>artP</i> complementation vector | This study       |
| <b>Designation</b> | <b>Plasmid</b>                                          | <b>Background (resistance)</b> | <b>Purpose</b>                                               | <b>Reference</b> |
| pZMG01             | pACYC184 empty vector                                   | CmR TetR                       | Parent complementation vector                                | NEB, Ipswich, MA |
| pZMG02             | pACYC184 <i>argR</i>                                    | TetR                           | <i>argR</i> ORF cloned into CmR cassette of pACYC184         | This study       |
| pZMG03             | pACYC184 <i>artP</i>                                    | TetR                           | <i>artP</i> ORF cloned into CmR cassette of pACYC184         | This study       |
| pZMG04             | pBAD empty vector                                       | AmR                            | Parent protein expression vector                             | NEB, Ipswich, MA |
| pZMG04             | pBAD <i>argR</i>                                        | AmR                            | N-terminally tagged <i>argR</i> expression vector            | This study       |

Table S2. Primers used in preparation of this manuscript; related to Bacterial Strains and Growth Conditions in Methods section

| <b>Primer</b>    | <b>Sequencing</b>         |
|------------------|---------------------------|
| <i>ler</i> F     | CGAGAGCAGGAAGTTCAAAGTG    |
| <i>ler</i> R     | ACACCTTTCGATGAGTTCCG      |
| <i>escC</i> F    | CTGAAGACAATGGCAAGTAATGG   |
| <i>escC</i> R    | ACTGCATTAAGACGTGGATCAG    |
| <i>escV</i> F    | GAGTGCAAAGGAAAGCCAG       |
| <i>escV</i> R    | ATGATACCAGCAATAGCGTCC     |
| <i>tir</i> F     | GAGGGAGTCAAATAGCGGTG      |
| <i>tir</i> R     | ATCTGAACGAAGGCTGGAAG      |
| <i>eae</i> F     | TGGGATGTTCAACGGTAAGTC     |
| <i>eae</i> R     | TTAACCTCAGCCCCATCAC       |
| <i>espA</i> F    | AGCTATTTGAGGAACTCGGTG     |
| <i>espA</i> R    | CATCTTTTGTGCCGTGGTTG      |
| <i>espB</i> F    | GGTCAAGGCTACGGAAAGTG      |
| <i>espB</i> R    | TCTTCAGCAAAGTCAGAGGC      |
| <i>Stx2a</i> F   | TGTCTGAAACTGCTCCTGTG      |
| <i>Stx2a</i> R   | GATATTCTCCCCACTCTGACAC    |
| <i>rpoA</i> RTF  | GTGACCCTTGAGCCTTTAGAG     |
| <i>rpoA</i> RTR  | ACACCATCAATCTCAACCTCG     |
| <i>infgama</i> F | CAGCAACAGCAAGGCGAAA       |
| <i>infgama</i> R | CTGGACCTGTGGGTTGAC        |
| <i>stx2d</i> F   | GTGGATATACGAGGGCTTGATG    |
| <i>stx2d</i> R   | CGAACCCGGCCACATATA        |
| <i>slc7a2</i> F  | GTGAAGAGGTTCGGAATCCACA    |
| <i>slc7a2</i> R  | CGTTAAAGCTGCAGAAACCCC     |
| <i>nos2</i> F    | CCTCTTTCAGGTCACCTTTGGTAGG |
| <i>nos2</i> R    | TTGGGTCTTGTTTCAGCCACGG    |
| <i>Gapdh</i> F   | TGTAGACCATGTAGTTGAGGTCA   |
| <i>Gapdh</i> R   | AGGTCGGTGTGAACGGATTG      |

|                          |                                                                                                                                 |
|--------------------------|---------------------------------------------------------------------------------------------------------------------------------|
| EHEC- <i>artP</i> -LR-F  | ATGAGTATTCAATTAACGGCATTAAATTGCTTCTACGGCGCGCATCAGGCG<br>TGTAGGCTGGAGCTGCTTC                                                      |
| EHEC- <i>artP</i> -LR-R  | TTAGTGAGAGAGATAGTTTTTAAATGCTTCGGTTTGC GGCTCGGTAAAGCC<br>ATATGAATATCCTCCTT                                                       |
| EHEC- <i>argR</i> -LR-F  | CAATAACTGCCTTAAAAAATTAAAGCTCCTGGTCGAACAGCTCTAAAATCGCTT<br>CATACAGGTCTTTGA                                                       |
| EHEC- <i>argR</i> -LR-R  | GAGCTAAGGAAGCTAAAATGCGAAGCTCGGCTAAGCAAGAAGAACTAGTTA<br>AAGCATTAAAGCATT                                                          |
| EHEC- <i>argH</i> -LR-F  | CAATAACTGCCTTAAAAAATTACCCCAACCGCGCCCTTGCAAAGCAATCGCC                                                                            |
| EHEC- <i>argH</i> -LR-R  | GAGCTAAGGAAGCTAAAATGGCACTTTGGGGCGGGCGTTTTACCCAGGCAG                                                                             |
| Citro- <i>artP</i> -LR-F | ATGAGTATTCAATTAACGGCATTAACTGCTTCTACGGCGCGCATCAGGCGCTGTTCGATA<br>TCACGCTGGATTGCCCGCAGGGCGAAACGCTGGTGTTCGCTGTAGGCTGGAGCTGCTTC     |
| Citro- <i>artP</i> -LR-R | TTAGTGAGAGAGATAGTTTTTAAACGCTTCGGTTTGC GGTTGGCAAAGCAACCTGCATCG<br>CCAAGCTCGACGATATGACCGTTTTCCATATACACGACGCATATGAATATCCTCCTT      |
| Citro- <i>argR</i> -LR-F | ATGCGAAGCTCCGCTAAGCAAGAAGAATTAGTAAAGGCGTTCAAAGCGCTCCTTAAAGAA<br>GAAAAATTCAGTTCCAGGGCGAAATCGTCCTCGCCTTGCCAATAACTGCCTTAAAAAA      |
| Citro- <i>argR</i> -LR-R | TTAGAGCTCTTGCTCAAACAGCTCAAGAATGGCTTCGTATAAGTCTT<br>TTACCGTGAAGCCGTTTCGCCGGGGTGGTGAAAATGGTGTTCGTCGCCA<br>GCAATGGAGCTAAGGAAGCTAAA |
| EHEC- <i>artP</i> F      | ATGCCGACATTTATGCTCGCC                                                                                                           |
| EHEC- <i>artP</i> R      | GCTTCGGTAGCAAAACGAATGGT                                                                                                         |
| EHEC- <i>argR</i> F      | GACGCAGGCATATTTCTCAATAACG                                                                                                       |
| EHEC- <i>argR</i> R      | GCGCTAACTGTTTCAGTTGATACT                                                                                                        |
| EHEC- <i>argH</i> F      | TAACGGTATGCCGATGGGTACG                                                                                                          |
| EHEC- <i>argH</i> R      | GACTGATAATTGCTCACAGAAACGG                                                                                                       |
| CR- <i>artP</i> F        | ATGAGTATTCAATTAACGGCATTAACTGCTTC                                                                                                |
| CR- <i>artP</i> R        | TTAGTGAGAGAGATAGTTTTTAAACGCTTCGGT                                                                                               |
| CR- <i>argR</i> F        | TTGATAACAATTAATTTACTTTT                                                                                                         |
| CR- <i>argR</i> R        | ATACAACACTACGCTAAATCGCACAAAT                                                                                                    |
| pACYC184 F               | TTTTAGCTTCCTTAGCTCCTGAAAATC                                                                                                     |
| pACYC184 R               | TTTTTAAAGGCAGTTATTGGTGCCCTTAAACGCCTGG                                                                                           |

|                        |                                     |
|------------------------|-------------------------------------|
| <i>set1_ler F_-169</i> | GTTGACATTTAATGATAATGTATTTTACACATTAG |
| <i>set1_ler R_+155</i> | CTCAATTACACTTTGAACTTCCTGCTCTCG      |
| <i>set2_ler F_-372</i> | CCTGTAACCTCGAATTAAGTAGAGTATAGTG     |
| <i>set2_ler R_-102</i> | CTATCAAATTAGGACACATCTATTTTCATCAAAC  |
| <i>set3_ler F_-575</i> | GGTTACTGTTTCAGCTATTTGTCCCTTGTTC     |
| <i>set3_ler R_-301</i> | GCGTTTCTCTTTATAAGATAGATCTCATTGC     |
| <i>set4_ler F_-493</i> | GTCCACCTTAGCGCTAAGCACTTTTGAATCAC    |
| <i>set4_ler R_-768</i> | GACGAGTATATATATCTATTAGCTGTTTCCC     |
| <i>set5_ler F_-693</i> | GGAAACTTATTTTGGCCTGTATATAATGTGATG   |
| <i>set5_ler R_-967</i> | GTCCGTTTTACTTGGCATCAGATCATCGCCG     |
| <i>set6_ler F_883</i>  | GCATCATATAGTGTCAATAATATAACAAG       |
| <i>Set6_ler R_1229</i> | GGCAACTTGAAAAGGGAAAGC               |
| <i>argI F</i>          | AACTGCAGCAGGCTGTTGA                 |
| <i>argI R</i>          | CCTCTTAATGTCCTGCCGAT                |
| <i>Kan F</i>           | CCGGAATTGCCAGCTGGGGCG               |
| <i>Kan R</i>           | TCTTGTTCAATCATGCGAAACGATCC          |

## Supplementary Figure Legends

**Fig. S1. Heat map for non-LEE encoded genes, *in vitro* growth for WT EHEC, select virulence genes for WT and  $\Delta argR$  EHEC in the presence or absence of arginine in high-glucose DMEM.** (A) Heat map showing the effect of arginine on non-LEE encoded genes and *recA* from WT EHEC grown in the presence (+arg) or absence (-arg) of 482  $\mu$ M arginine. (B) *In vitro* growth curve of microaerophilic grown WT EHEC in low-glucose DMEM in the presence (+arg) or absence (-arg) of arginine (482  $\mu$ M). (C) Western blot analysis of secreted protein EspA from WT,  $\Delta argR$  EHEC. Experiments in C were performed in microaerophilic conditions using high-glucose DMEM with or without arginine, and samples were harvested in late log phase. Error bars represent standard error of mean (SEM). \*P < 0.05, \*\*P < 0.01.

**Fig. S2. *In vitro* growth for WT,  $\Delta artP$  and  $\Delta argH$  EHEC and respective complement strains.** (A) *In vitro* growth curve of microaerophilic grown WT or  $\Delta artP$  or complement EHEC (complemented with *artP* gene on the pACYC184) in low-glucose DMEM with arginine. *In vitro* growth curve of microaerophilic grown WT or  $\Delta argH$  EHEC in low-glucose DMEM with arginine (B) or without arginine (C).

**Fig. S3. *In vitro* growth for WT and  $\Delta argR$  EHEC and complement strains. Select virulence genes for WT and  $\Delta argR$  EHEC in the presence or absence of arginine.** (A) *In vitro* growth curve of microaerophilic grown or complement EHEC (complemented with *argR* gene on the pACYC184). (B) qRT-PCR analysis to compare the expression of *nleA* and *recA*

genes WT or  $\Delta argR$  in low-glucose DMEM with arginine or without arginine. (C) qRT-PCR analysis to compare the expression of select virulence genes and (D) Western blot analysis of secreted protein EspB from WT,  $\Delta argR$  and cpl EHEC in low-glucose DMEM without arginine. (E) Western blot analysis of secreted protein EspB from WT without arginine and  $\Delta argR$  with arginine. Error bars represent standard error of mean (SEM). \*P < 0.05, \*\*P < 0.01.

**Fig. S4. ArgR is a regulator of LEE.** EMSA of His-tagged ArgR and kanamycin probe (negative control), *argI* promoter probe (positive control), and six segments of the EHEC LEE1 regulatory region numbered from the proximal transcriptional start site.

**Fig. S5. Arginine induces *Citrobacter rodentium* virulence *in vitro*.** (A) qRT-PCR of LEE genes and Shiga toxin 2a, (B) Western blot analysis of secreted proteins EspB and EspA from WT *C. rodentium* grown in the presence (+arg) or absence (-arg) of arginine (482  $\mu$ M). (C) qRT-PCR analysis to compare the expression of select virulence genes and (D) Western blot analysis of secreted proteins EspB and EspA from WT,  $\Delta argR$  and cpl *C. rodentium* (complemented with *argR* gene on the pACYC184). All experiments were performed in microaerophilic conditions using low-glucose DMEM, and samples were harvested in late log phase. Error bars represent standard error of mean (SEM). \*P < 0.05, \*\*P < 0.01, \*\*\*P < 0.001.

**Fig. S6.  $\Delta ArtP$  *Citrobacter rodentium* strain do not colonize lower intestine of mice.** Each symbol indicates the value for an individual mouse 8 days postinfection. (A) Colonization in cecum, colon and stools of mice infected with either WT or  $\Delta artP$  *C. rodentium*. (B) Expression of *nos2* in colon of mice infected with WT or  $\Delta artP$  *C. rodentium* or gavaged with PBS. (C)

Survival curve of mice infected with WT or  $\Delta artP$  *C. rodentium*. A total of n=10 mice per group were used for survival curve. (E) Histological score and (F) representation (10X) of colon eight days after WT or  $\Delta artP$  *C. rodentium* infection. Error bars represent standard error of mean (SEM). \*P < 0.05, \*\*P < 0.01, \*\*\*\*P < 0.0001.

**Fig. S7. The role of dietary arginine in murine *C. rodentium* infection.** Each symbol indicates the value for an individual mouse. (A) CFU in stools and (B) arginine levels in colon content of mice in either arginine minus or arginine plus diet infected with WT *C. rodentium* for four days. Error bars represent standard error of mean (SEM). \*P < 0.05.



**A****Non-LEE encoding effectors**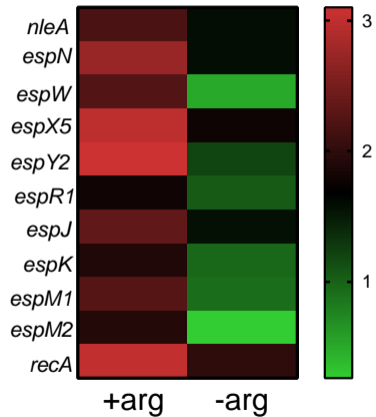**B**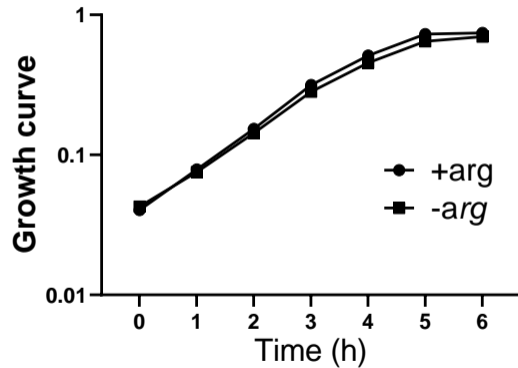**C**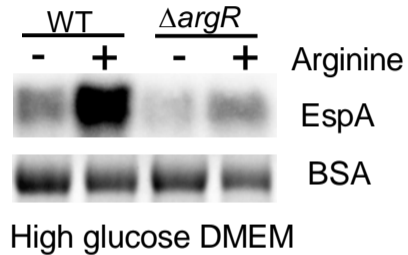**Figure S1**

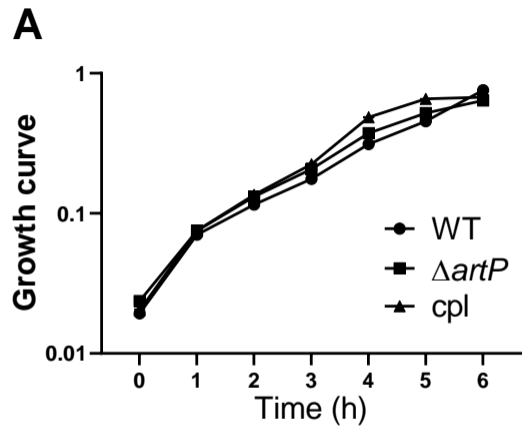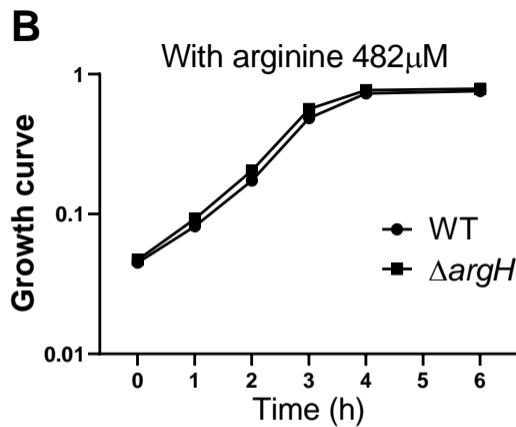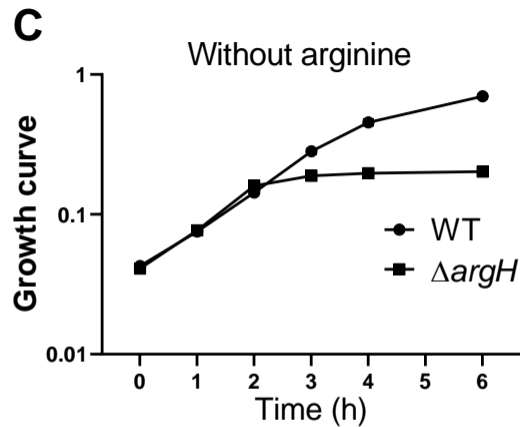

Figure S2

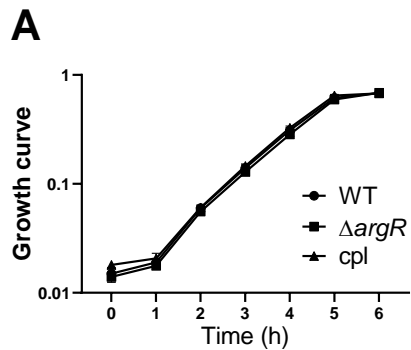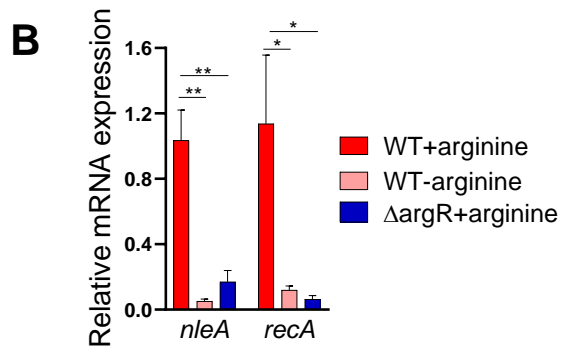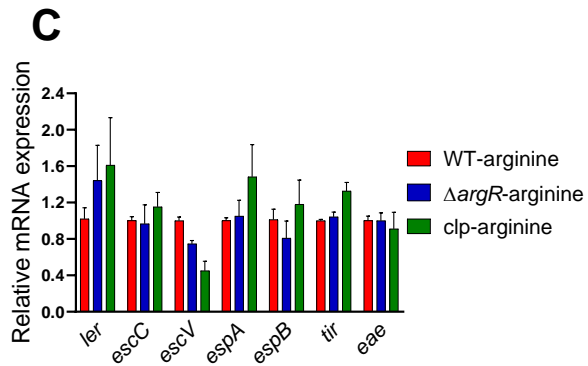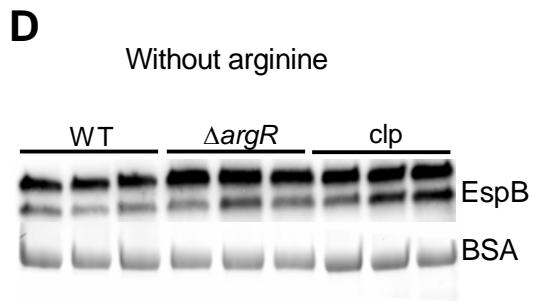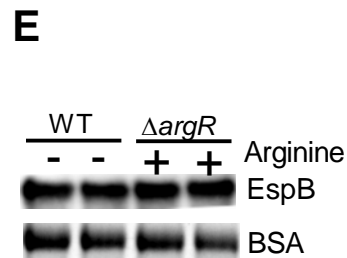

Figure S3

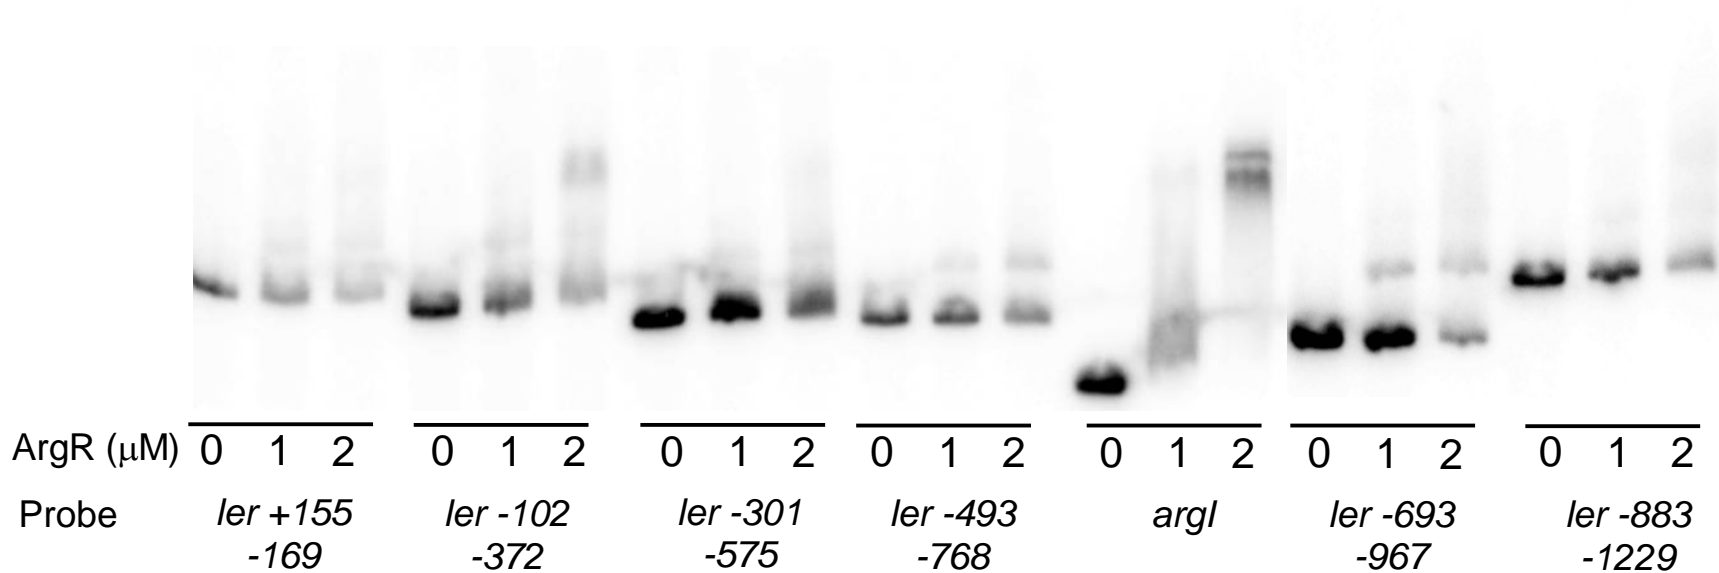

Figure S4

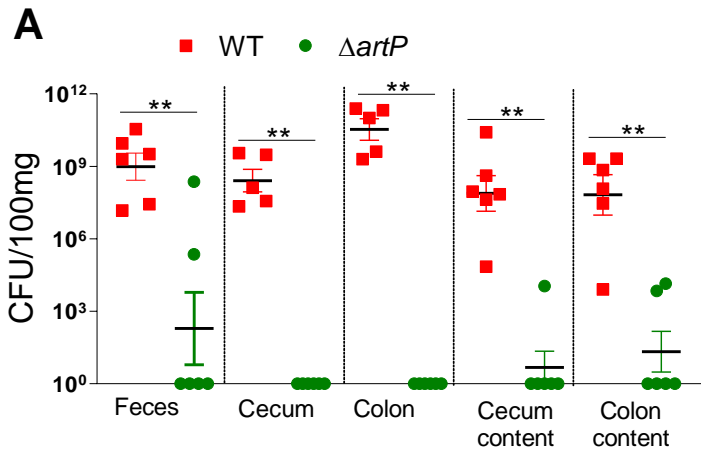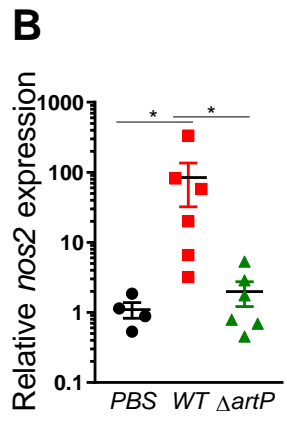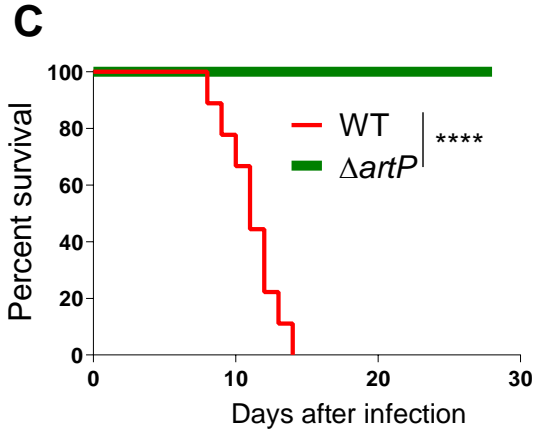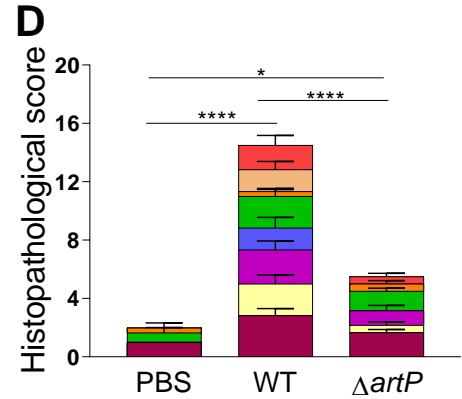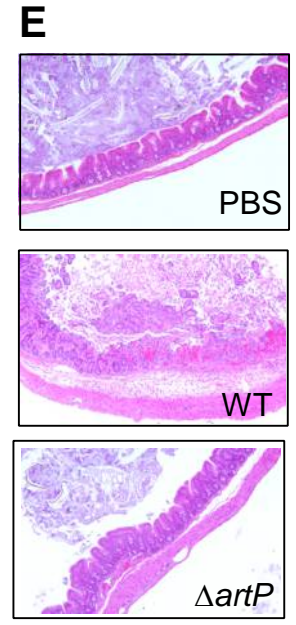

Figure S5

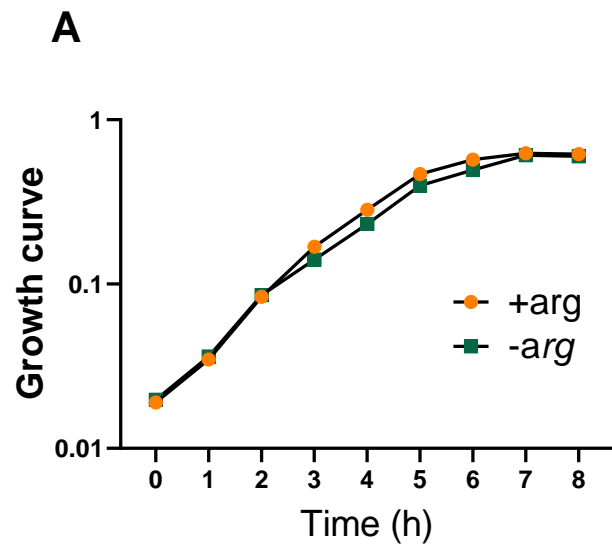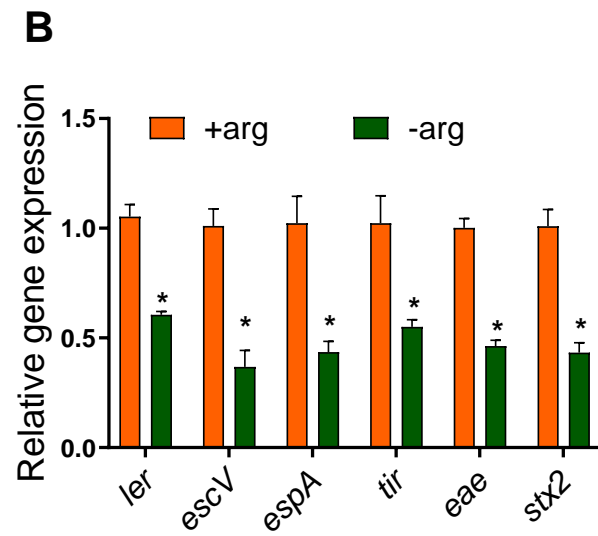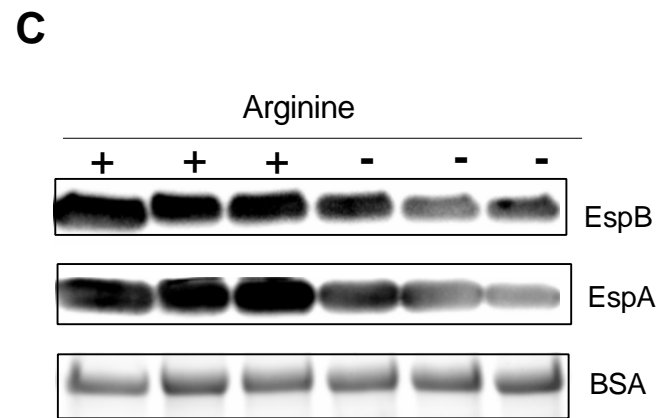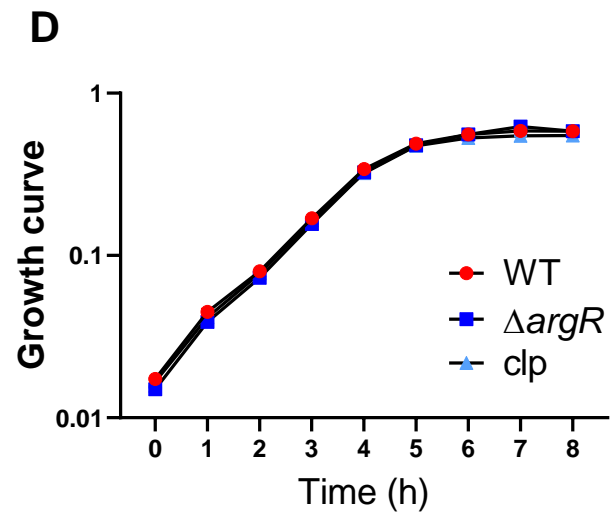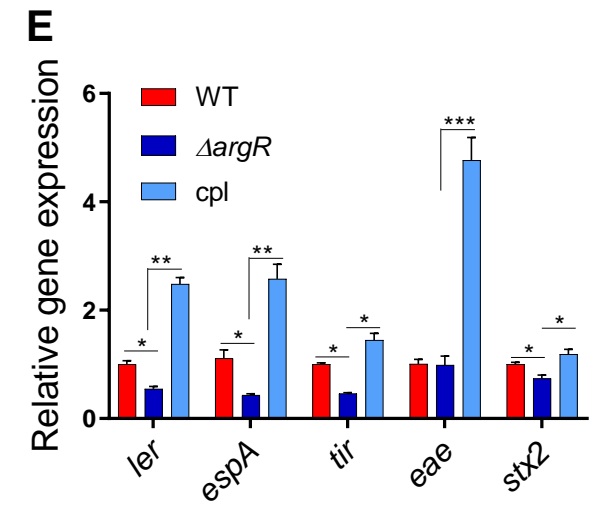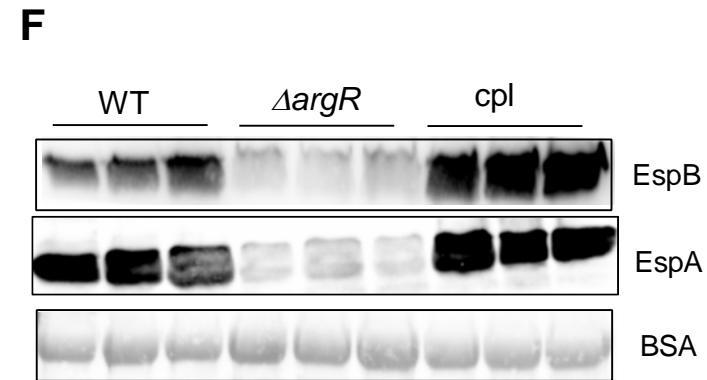

Figure S6

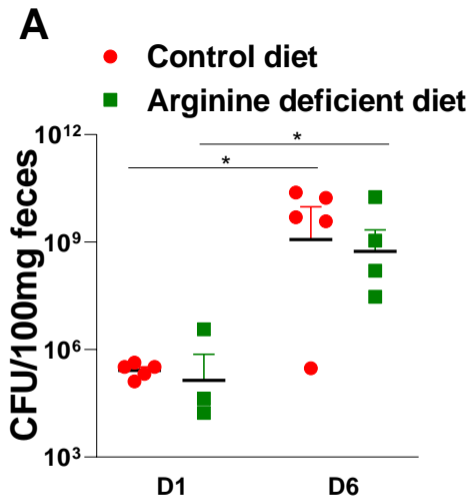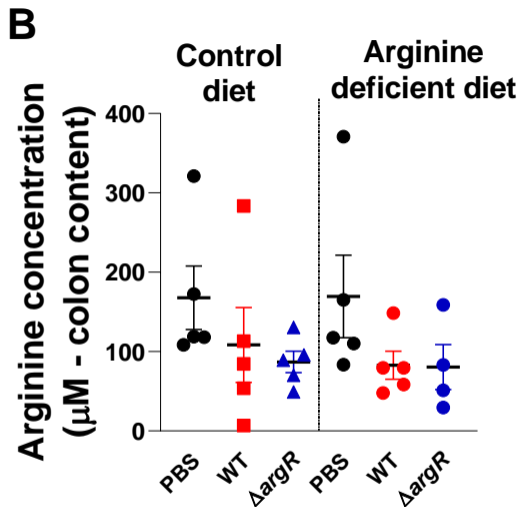

Figure S7
